# Supplementary material for: WUSCHEL acts as an auxin response rheostat to maintain apical stem cells in Arabidopsis
Source: PubMed Central journal article supplement (PMC6841675; doi:10.1038/s41467-019-13074-9), 2019-11-08
Supplement: 41467_2019_13074_MOESM1_ESM.pdf [file 41467_2019_13074_MOESM1_ESM.pdf]

**SUPPLEMENTARY FIGURES AND TABLES FOR**

**WUSCHEL acts as an auxin response rheostat to maintain  
apical stem cells in *Arabidopsis***

***Yanfei Ma<sup>1§</sup>, Andrej Miotk<sup>1§</sup>, Zoran Šutiković<sup>1§</sup>, Olga Ermakova<sup>1</sup>, Christian Wenzl<sup>1</sup>, Anna Medzihradzky<sup>1</sup>, Christophe Gaillochet<sup>1</sup>, Joachim Forner<sup>1</sup>, Gözde Utan<sup>1</sup>, Klaus Brackmann<sup>2</sup>, Carlos S. Galvan-Ampudia<sup>3</sup>, Teva Vernoux<sup>3</sup>, Thomas Greb<sup>4</sup> & Jan U. Lohmann<sup>1\*</sup>***

<sup>1</sup>Department of Stem Cell Biology, Centre for Organismal Studies, Heidelberg University; D-69120 Heidelberg, Germany

<sup>2</sup>Gregor Mendel Institute (GMI), Austrian Academy of Sciences, Vienna Biocenter (VBC), Dr. Bohr-Gasse 3, 1030 Vienna, Austria

<sup>3</sup>Laboratoire Reproduction et Développement des Plantes, Univ Lyon, ENS de Lyon, UCB Lyon 1, CNRS, INRA, F-69342 Lyon, France

<sup>4</sup>Department of Developmental Physiology, Centre for Organismal Studies, Heidelberg University; D-69120 Heidelberg, Germany

§ these authors contributed equally

\*corresponding author

Mailing address of corresponding author:

Jan U. Lohmann  
Department of Stem Cell Biology  
Heidelberg University  
Im Neuenheimer Feld 230  
D-69120 Heidelberg  
Germany

PH: +49 6221 546269  
FX: +49 6221 546424  
EM: [jlohmann@meristemaniamania.org](mailto:jlohmann@meristemaniamania.org)

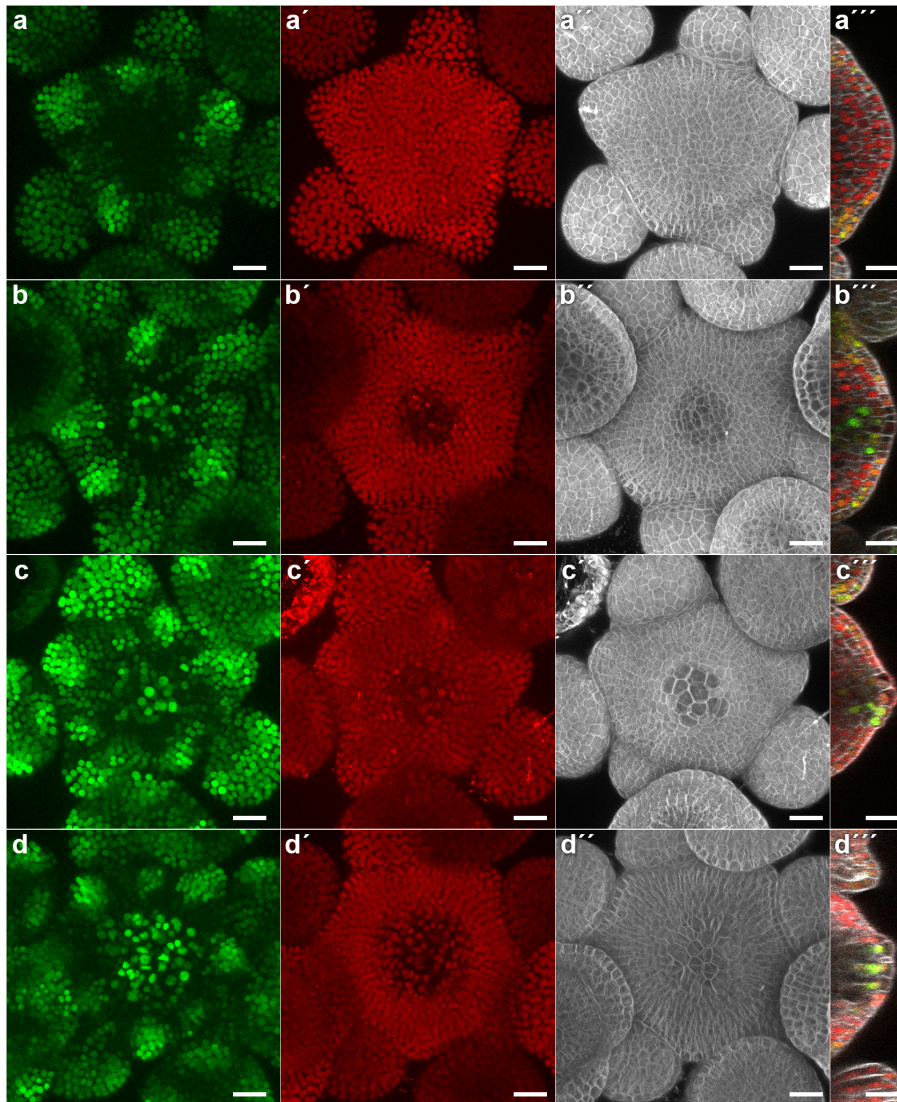

**Supplementary Fig. 1: Activation of DR5v2 and differentiation after induced stem cell loss.**

Representative SAMs of the imaged cohorts quantified in Fig. 2f and Supplementary Fig 2. A) 0h after induction B) 36h after induction C) 72h after induction D) 120h after induction. Left panels show *pDR5v2:3xVENUS-NLS* signal, middle panels show *pRPS5a:NLS-tdTomato* and right panels show DAPI stained cell walls. Small panels on the far-right show Z-projections of all channels through the center of the SAM. Scale bars 20  $\mu\text{m}$ .

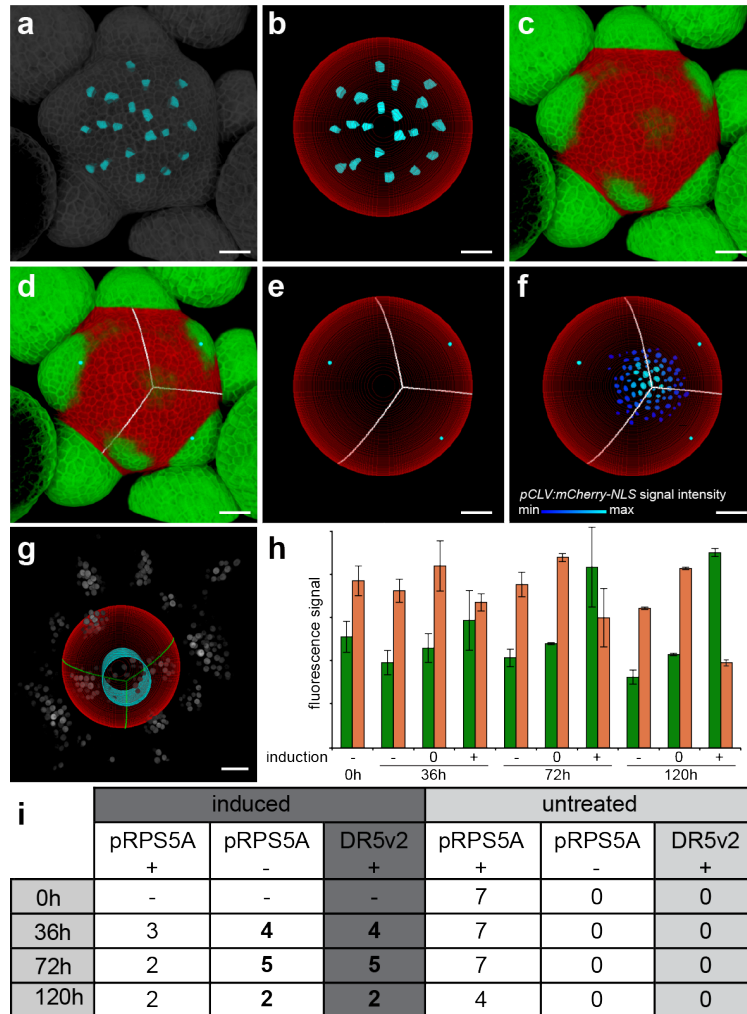

**Supplementary Figure 2: Computational strategy to identify stem cells and DR5v2 quantification.**

**a)** In a first step, cells across the L1 of the SAM are segmented. **b)** Based on the position of segmented cells, a perfect sphere is fitted to the SAM. **c)** The sphere is applied to the SAM and organ primordia are identified by emergence through the sphere. **d, e)** Equidistant points between the primordia are calculated and used to triangulate the center of the SAM. **f)** The triangulated center was benchmarked against SAMs harboring *pCLV3* reporter labelled stem cells (n=9). The triangulation invariably identified one of the most central *pCLV3* positive cells. See also Methods. **g)** For signal quantification in the stem cell domain, a cylinder with radius  $r_{cyl} (= 1/3 * r_{sphere})$  mimicking the average size of the *CLV3* domain was placed into the computationally identified center of the SAM and fluorescence intensities were quantified within this narrowly defined subdomain. DR5v2-NLS signals are shown in grey, SAM sphere derived from segmentation in red, triangulation lines in green and quantification cylinder in cyan. **h)** Quantification of fluorescent signals from all SAMs of the stem cell

loss experiment described in Fig. 2 and Supplementary Fig. 1. Total fluorescence signal intensities for *pDR5v2:3xVENUS-NLS* and *pRPS5a:NLS-tdTomato* for the inner region ( $I_{cyl}$ ) and for the peripheral region ( $I_{sphere}$ ) were extracted from respective image volumes.  $I_{cyl}$  was averaged over all plants for each time-point and condition and normalized to the overall signal ( $I_{cyl} + I_{sphere}$ ). Green bars: DR5v2:3xVENUS-NLS signal, orange bars: pRPS5a:NLS-tdTomato signal. - : mock treated, 0: ethanol induced, but no observable stem cell loss, + : ethanol induced and stem cell loss. **i)** Quantification of DR5v2 response to induction of iCalSm at the per plant level. Number of plants scored for loss of *RPS5a* promoter activity from stem cells and DR5v2 expression are shown. Stem cell loss and associated DR5v2 activation exclusively occurred in induced plants. All plants with stem cell loss as shown by reduced *pRPS5a* activity expressed DR5v2. *pRPS5a* + denotes plants with uncompromised *pRPS5a* promoter activity in stem cells. *pRPS5a* - denotes plants with reduced *pRPS5a* promoter activity in stem cells. DR5v2 + denotes plants with DR5v2 activity in stem cells. Scale bars 20  $\mu$ m.



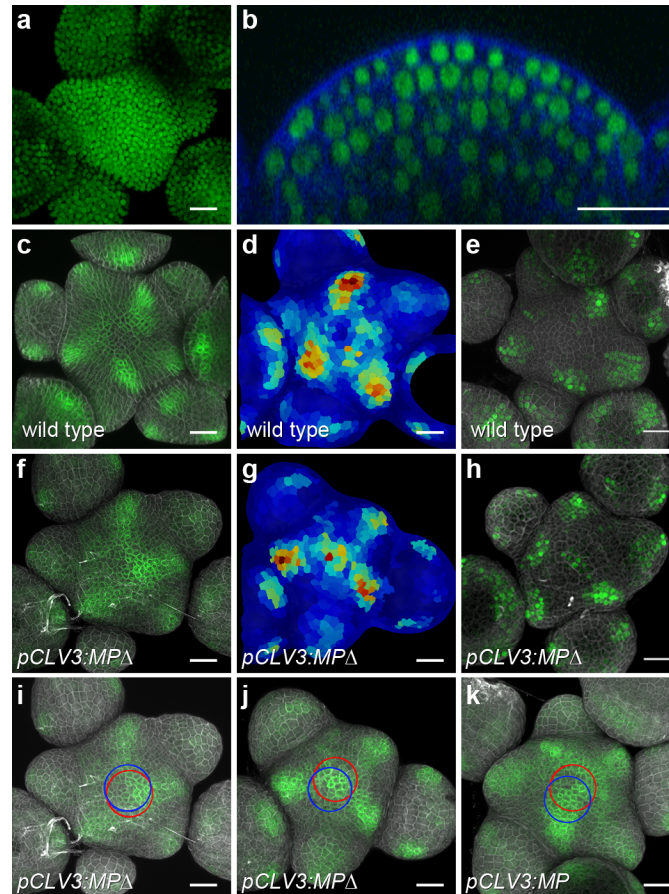

**Supplementary Figure 3: Activity of the *pHMG* promoter, behavior of nuclear and ER localized DR5v2 reporters and auxin signaling output in wild type and *pCLV3:MPΔ* lines.**

**a, b)** Transgenic line carrying 1347 bp upstream of the At1g76110 locus fused to the *GFP-NLS* coding sequence. **a)** GFP channel in top view. **b)** Side view through a representative SAM showing DAPI and GFP channel. **c)** *pDR5v2:ER-EYFP-HDEL* in wild type. **d)** Per cell quantification of an independent *pDR5v2:ER-EYFP-HDEL* wild-type SAM. **e)** *pDR5v2:3xVENUS-NLS* in wild type. **f-k)** Auxin signaling output was present in the center of *pCLV3:MP* and *pCLV3:MPΔ* lines, indicated by two independent reporters *pDR5v2:ER-EYFP-HDEL* (6 out of 8 independent T1 plants) (F) and *pDR5v2:3xVENUS-NLS* (6 out of 7 independent T1 plants) (H). **g)** Per cell quantification of *pDR5v2:ER-EYFP-HDEL* in an independent *pCLV3:MPΔ* SAM. DR5v2 activity was not observed in the center of wild-type SAMs grown in the same experiments. **i-k)** Computationally derived central zone in L1 (red) and L3 (blue) are superimposed to SAMs of *pDR5v2:ER-EYFP-HDEL* carrying *pCLV3:MPΔ* (I, J) and *pCLV3:MP* (K). DR5v2 signal clearly coincides with central zone. Scale bars 20  $\mu$ m.

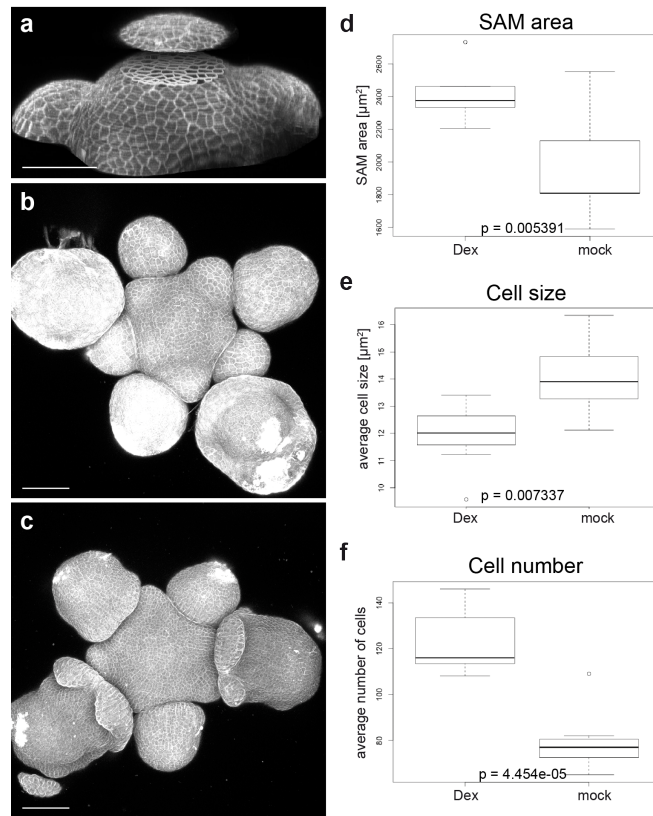

**Supplementary Figure 4: Morphological effects of WUS-GR induction.**

**a)** Visualization of meristem morphology analysis strategy. Meristem size, cell count and average cell size were measured at a constant relative position defined by the image plane in which the L1 to L2 transition became visible. **b)** Mock treated and **c)** DEX induced *pUBI:mCherry-GR-linker-WUS* SAMs four days after local application. Following WUS induction, SAM size increased (**d**), cell size decreased (**e**) and cell number strongly increased (**f**)  $n=7$  and  $8$  meristems, respectively.  $p$ -values derived by t-test. Scale bars  $50 \mu\text{m}$ .

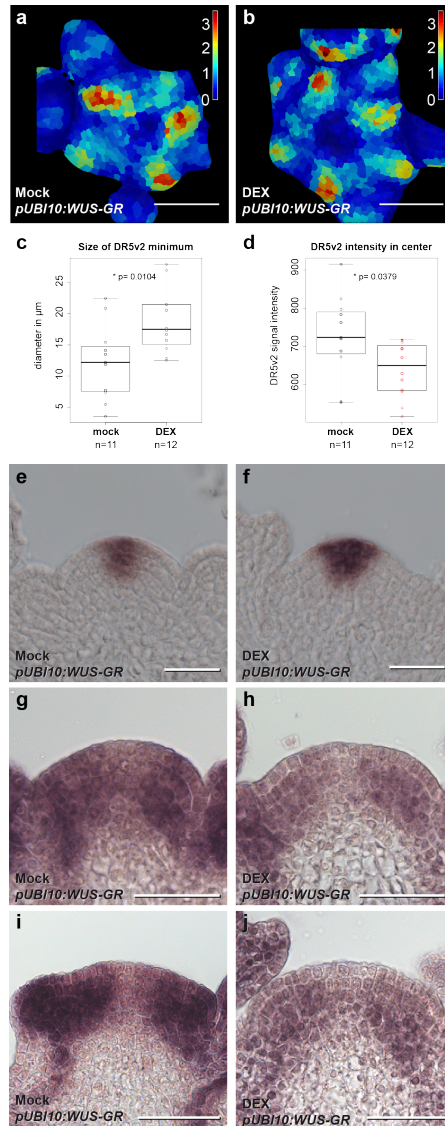

### Supplementary Figure 5: SAM specific molecular responses to ectopic WUS induction in *pUBI10:WUS-GR* lines.

24 hours after induction of ectopic WUS-GR activity, DR5v2 signal in the central zone was suppressed and *CLV3* mRNA expression was enhanced. Representative in situ quantifications of DR5v2 signal after mock (a) and DEX (b) treatments. c) Quantification of the size of the central DR5v2 minimum. d) Quantification of the average DR5v2 signal intensity in the central zone. p-values derived by t-test. e) *CLV3* mRNA expression after 24 hours of mock treatment. f) *CLV3* mRNA expression after 24 hours of DEX treatment. g) *TIR1* mRNA expression after 24 hours of mock treatment. h) *TIR1* mRNA expression after 24 hours of DEX treatment. i) *MP* mRNA expression after 24 hours of mock treatment. j) *MP* mRNA expression after 24 hours of DEX treatment. SAMs of both treatment types were hybridized on the same microscopic slide and imaged under identical settings. Scale bars 50  $\mu\text{m}$ .

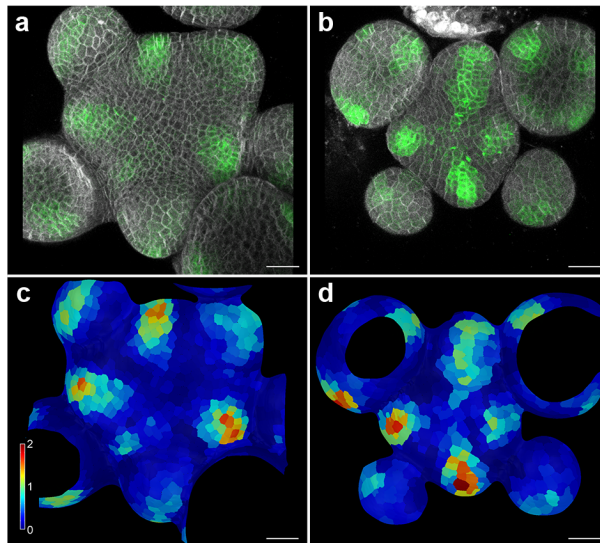

**Supplementary Figure 6: SAMs of *wus-7* plants show auxin signaling output in the stem cell domain.**

**a)** Representative image of *pDR5v2:ER-eYFP-HDEL* signal in the SAM of *Ler* wild-type plants. Only 16% of plants showed DR5v2 activity in the center of the SAM (n=38).  
**b)** Representative image of *pDR5v2:ER-eYFP-HDEL* signal in a *wus-7* SAM before termination. 61% of *wus-7* plants showed DR5v2 activity in the center of the SAM (n=13).  
**c)** Per cell quantification of DR5v2 signal in wild type  
**d)** Per cell quantification of DR5v2 signal in *wus-7*. Scale bars 20  $\mu\text{m}$ .



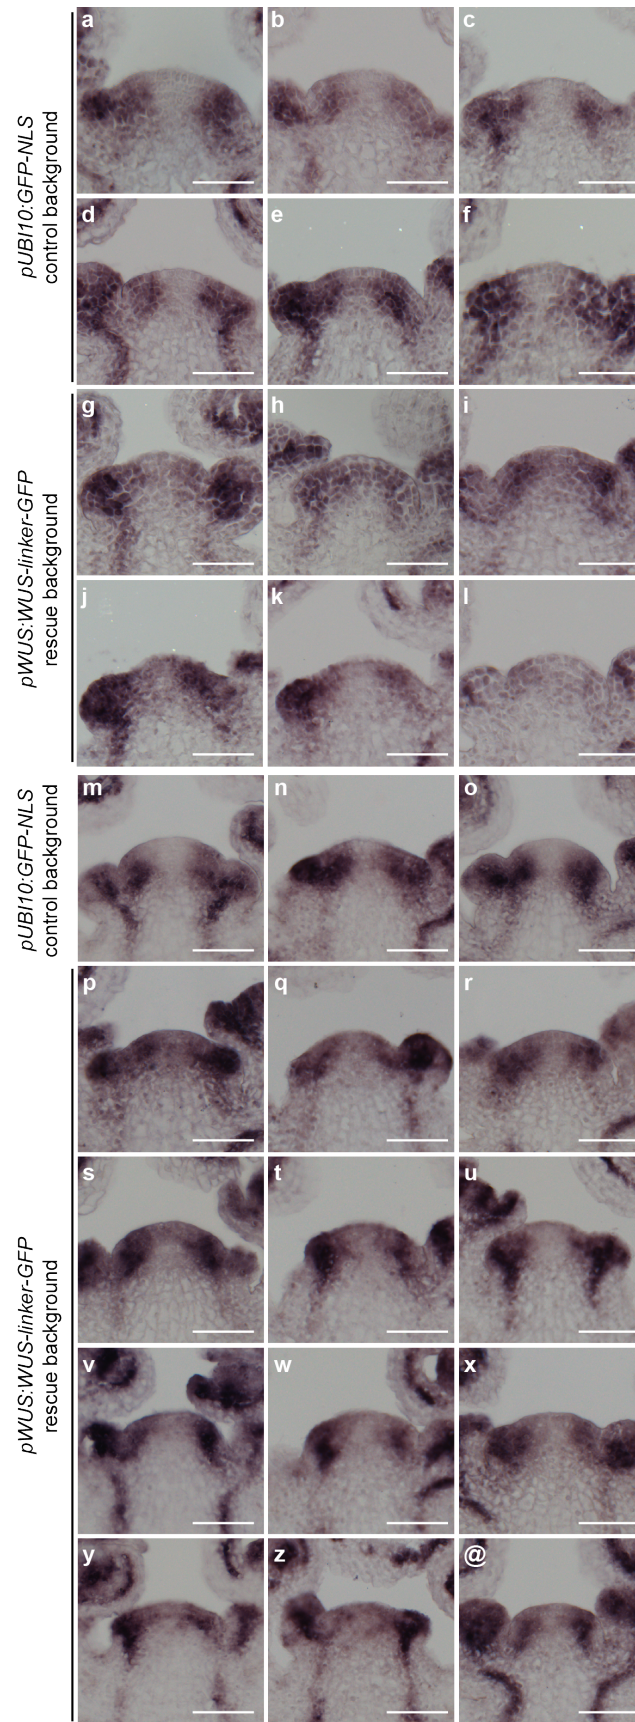

**Supplementary Figure 7: *MP* mRNA expression after induced *WUS* loss of function in two independent experiments.**

**a-l) Experiment I. a-f)** In situ detection of *MP* mRNA in *pUBQ10:GFP-NLS* control plants carrying *pCLV3:AlcR/AlcA:NSlmb-vhhGFP4* after 24h of ethanol treatment. **g-l)** In situ detection of *MP* mRNA in stable *pWUS:WUS-linker-GFP wus* rescue plants carrying *pCLV3:AlcR/AlcA:NSlmb-vhhGFP4* after 24h of ethanol treatment.

**m-@) Experiment II. m-o)** In situ detection of *MP* mRNA in *pUBQ10:GFP-NLS* control plants carrying *pCLV3:AlcR/AlcA:NSlmb-vhhGFP4* after 24h of ethanol treatment. **p-@)** In situ detection of *MP* mRNA in stable *pWUS:WUS-linker-GFP wus* rescue plants carrying *pCLV3:AlcR/AlcA:NSlmb-vhhGFP4* after 24h of ethanol treatment.

SAMs of both genotypes were hybridized in sets of two independent experiments and imaged under identical settings. Unadjusted images are shown. Scale bars 50  $\mu\text{m}$ .



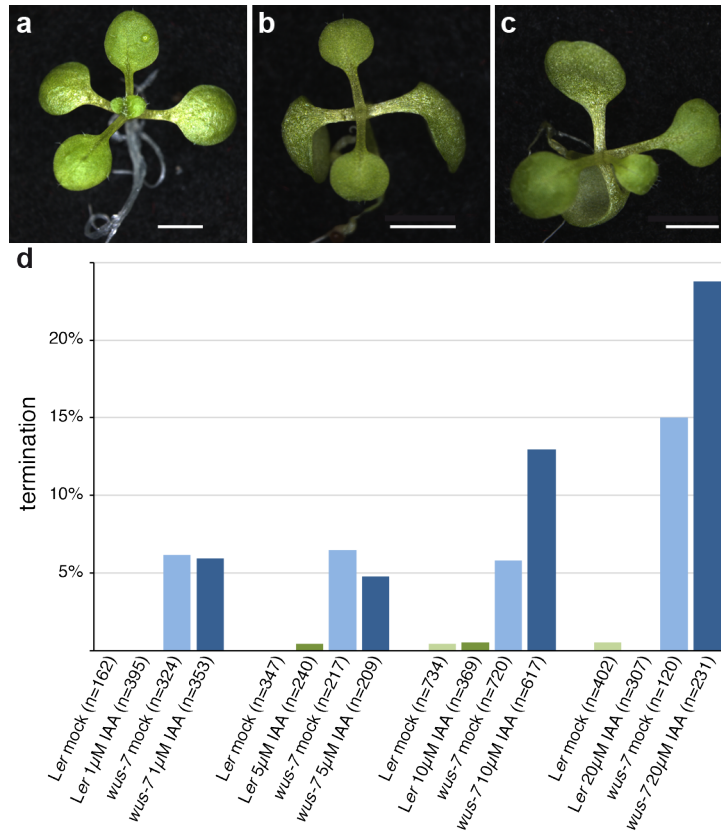

**Supplementary Figure 8: Seedling phenotypes eleven days after germination on auxin supplemented plates and SAM termination frequencies on increasing auxin concentrations.**

Phenotypes of seedlings grown on plates containing 10  $\mu\text{M}$  IAA ranged from **a**) unaffected, to **b**) arrested at four leaves stage, or **c**) arrested at five leaves stage with a terminal leaf. **d**) Quantification of terminated seedlings grown on plates containing various concentrations of auxin. Wild-type *Ler* and *wus-7* seedlings were tested on 1-20  $\mu\text{M}$  IAA, termination in *wus-7* starts to occur on 10  $\mu\text{M}$  IAA, wild type is resistant to even 20  $\mu\text{M}$  IAA. Scale bars 1 mm.

|    | GO ID      | Term                                                                    | Annotated genes | Significant genes | Expected | p-Value  |
|----|------------|-------------------------------------------------------------------------|-----------------|-------------------|----------|----------|
| 1  | GO:0010200 | response to chitin                                                      | 393             | 145               | 55.45    | 2.80E-30 |
| 2  | GO:0009611 | response to wounding                                                    | 313             | 109               | 44.16    | 1.00E-20 |
| 3  | GO:0010363 | regulation of plant-type hypersensitive response                        | 336             | 111               | 47.41    | 4.60E-19 |
| 4  | GO:0006612 | protein targeting to membrane                                           | 340             | 111               | 47.97    | 1.30E-18 |
| 5  | GO:0009414 | response to water deprivation                                           | 374             | 130               | 52.77    | 5.70E-18 |
| 6  | GO:0009867 | jasmonic acid mediated signaling pathway                                | 256             | 89                | 36.12    | 1.20E-15 |
| 7  | GO:0009733 | response to auxin                                                       | 354             | 107               | 49.95    | 2.30E-15 |
| 8  | GO:0002679 | respiratory burst involved in defense response                          | 114             | 50                | 16.09    | 1.10E-14 |
| 9  | GO:0009737 | response to abscisic acid                                               | 548             | 174               | 77.32    | 1.10E-14 |
| 10 | GO:0009738 | abscisic acid-activated signaling pathway                               | 232             | 78                | 32.74    | 1.10E-12 |
| 11 | GO:0009651 | response to salt stress                                                 | 704             | 187               | 99.33    | 2.60E-12 |
| 12 | GO:0009695 | jasmonic acid biosynthetic process                                      | 125             | 49                | 17.64    | 3.40E-12 |
| 13 | GO:0006857 | oligopeptide transport                                                  | 97              | 41                | 13.69    | 1.10E-11 |
| 14 | GO:0050832 | defense response to fungus                                              | 303             | 84                | 42.75    | 3.30E-10 |
| 15 | GO:0009862 | systemic acquired resistance, salicylic acid mediated signaling pathway | 222             | 66                | 31.32    | 1.20E-09 |
| 16 | GO:0042538 | hyperosmotic salinity response                                          | 152             | 50                | 21.45    | 2.90E-09 |
| 17 | GO:0009612 | response to mechanical stimulus                                         | 59              | 27                | 8.32     | 4.50E-09 |
| 18 | GO:0042742 | defense response to bacterium                                           | 344             | 93                | 48.54    | 4.90E-09 |
| 19 | GO:0009684 | indoleacetic acid biosynthetic process                                  | 94              | 36                | 13.26    | 5.20E-09 |
| 20 | GO:0006569 | tryptophan catabolic process                                            | 67              | 29                | 9.45     | 6.00E-09 |
| 21 | GO:0009723 | response to ethylene                                                    | 325             | 101               | 45.86    | 1.20E-08 |
| 22 | GO:0009753 | response to jasmonic acid                                               | 427             | 141               | 60.25    | 1.20E-08 |
| 23 | GO:0009873 | ethylene-activated signaling pathway                                    | 118             | 41                | 16.65    | 1.30E-08 |
| 24 | GO:0009620 | response to fungus                                                      | 440             | 132               | 62.08    | 2.50E-08 |
| 25 | GO:0000165 | MAPK cascade                                                            | 197             | 57                | 27.8     | 4.50E-08 |
| 26 | GO:0009963 | positive regulation of flavonoid biosynthetic process                   | 93              | 34                | 13.12    | 5.30E-08 |
| 27 | GO:0006355 | regulation of transcription, DNA-templated                              | 1588            | 296               | 224.07   | 7.10E-08 |
| 28 | GO:0043069 | negative regulation of programmed cell death                            | 158             | 48                | 22.29    | 1.00E-07 |
| 29 | GO:0009739 | response to gibberellin                                                 | 143             | 49                | 20.18    | 1.10E-07 |
| 30 | GO:0031348 | negative regulation of defense response                                 | 246             | 65                | 34.71    | 2.30E-07 |
| 31 | GO:0009409 | response to cold                                                        | 539             | 118               | 76.05    | 4.20E-07 |
| 32 | GO:0009750 | response to fructose                                                    | 127             | 39                | 17.92    | 1.10E-06 |
| 33 | GO:0030968 | endoplasmic reticulum unfolded protein response                         | 171             | 48                | 24.13    | 1.30E-06 |
| 34 | GO:0009693 | ethylene biosynthetic process                                           | 110             | 35                | 15.52    | 1.60E-06 |
| 35 | GO:0009805 | coumarin biosynthetic process                                           | 51              | 21                | 7.2      | 2.00E-06 |
| 36 | GO:0010310 | regulation of hydrogen peroxide metabolic process                       | 159             | 45                | 22.43    | 2.20E-06 |
| 37 | GO:0030003 | cellular cation homeostasis                                             | 146             | 42                | 20.6     | 3.00E-06 |
| 38 | GO:0007623 | circadian rhythm                                                        | 156             | 44                | 22.01    | 3.20E-06 |
| 39 | GO:0006833 | water transport                                                         | 118             | 36                | 16.65    | 3.40E-06 |
| 40 | GO:0009741 | response to brassinosteroid                                             | 102             | 37                | 14.39    | 3.60E-06 |
| 41 | GO:0080167 | response to karrikin                                                    | 114             | 35                | 16.09    | 4.00E-06 |
| 42 | GO:0002237 | response to molecule of bacterial origin                                | 97              | 31                | 13.69    | 5.60E-06 |
| 43 | GO:0006979 | response to oxidative stress                                            | 407             | 90                | 57.43    | 6.50E-06 |
| 44 | GO:0006813 | potassium ion transport                                                 | 35              | 16                | 4.94     | 6.60E-06 |
| 45 | GO:0046777 | protein autophosphorylation                                             | 131             | 37                | 18.48    | 1.80E-05 |
| 46 | GO:0006598 | polyamine catabolic process                                             | 34              | 15                | 4.8      | 2.20E-05 |
| 47 | GO:0035556 | intracellular signal transduction                                       | 446             | 133               | 62.93    | 2.30E-05 |
| 48 | GO:0009269 | response to desiccation                                                 | 31              | 14                | 4.37     | 3.00E-05 |
| 49 | GO:0031347 | regulation of defense response                                          | 485             | 146               | 68.43    | 3.00E-05 |
| 50 | GO:0009825 | multidimensional cell growth                                            | 96              | 29                | 13.55    | 3.70E-05 |
| 51 | GO:0009697 | salicylic acid biosynthetic process                                     | 181             | 46                | 25.54    | 3.70E-05 |
| 52 | GO:0019344 | cysteine biosynthetic process                                           | 181             | 46                | 25.54    | 3.70E-05 |
| 53 | GO:0006970 | response to osmotic stress                                              | 749             | 207               | 105.68   | 4.10E-05 |
| 54 | GO:0070838 | divalent metal ion transport                                            | 184             | 53                | 25.96    | 6.90E-05 |
| 55 | GO:0009627 | systemic acquired resistance                                            | 395             | 109               | 55.73    | 7.70E-05 |
| 56 | GO:0006949 | syncytium formation                                                     | 19              | 10                | 2.68     | 8.30E-05 |
| 57 | GO:0042398 | cellular modified amino acid biosynthetic process                       | 50              | 18                | 7.06     | 9.10E-05 |
| 58 | GO:0009751 | response to salicylic acid                                              | 423             | 122               | 59.69    | 9.80E-05 |
| 59 | GO:0042631 | cellular response to water deprivation                                  | 59              | 20                | 8.32     | 1.00E-04 |
| 60 | GO:0009965 | leaf morphogenesis                                                      | 186             | 49                | 26.24    | 1.10E-04 |
| 61 | GO:0010583 | response to cyclopentenone                                              | 132             | 35                | 18.63    | 1.20E-04 |
| 62 | GO:0001666 | response to hypoxia                                                     | 74              | 23                | 10.44    | 1.40E-04 |
| 63 | GO:0007030 | Golgi organization                                                      | 160             | 40                | 22.58    | 1.70E-04 |
| 64 | GO:0016126 | sterol biosynthetic process                                             | 150             | 38                | 21.17    | 1.80E-04 |
| 65 | GO:0019748 | secondary metabolic process                                             | 527             | 133               | 74.36    | 2.20E-04 |
| 66 | GO:0006468 | protein phosphorylation                                                 | 620             | 157               | 87.48    | 2.40E-04 |
| 67 | GO:0006995 | cellular response to nitrogen starvation                                | 21              | 10                | 2.96     | 2.40E-04 |
| 68 | GO:0009863 | salicylic acid mediated signaling pathway                               | 315             | 92                | 44.45    | 2.80E-04 |
| 69 | GO:0009407 | toxin catabolic process                                                 | 180             | 43                | 25.4     | 2.90E-04 |
| 70 | GO:0009595 | detection of biotic stimulus                                            | 92              | 26                | 12.98    | 3.00E-04 |

|     | GO ID      | Term                                                             | Annotated genes | Significant genes | Expected | p-Value  |
|-----|------------|------------------------------------------------------------------|-----------------|-------------------|----------|----------|
| 71  | GO:0046686 | response to cadmium ion                                          | 415             | 84                | 58.56    | 3.30E-04 |
| 72  | GO:0006816 | calcium ion transport                                            | 108             | 29                | 15.24    | 3.60E-04 |
| 73  | GO:0042335 | cuticle development                                              | 42              | 15                | 5.93     | 3.80E-04 |
| 74  | GO:0009617 | response to bacterium                                            | 499             | 140               | 70.41    | 4.00E-04 |
| 75  | GO:0010264 | myo-inositol hexakisphosphate biosynthetic process               | 51              | 17                | 7.2      | 4.10E-04 |
| 76  | GO:0010119 | regulation of stomatal movement                                  | 47              | 16                | 6.63     | 4.60E-04 |
| 77  | GO:0043900 | regulation of multi-organism process                             | 115             | 30                | 16.23    | 4.90E-04 |
| 78  | GO:0010017 | red or far-red light signaling pathway                           | 39              | 14                | 5.5      | 5.60E-04 |
| 79  | GO:0010260 | animal organ senescence                                          | 27              | 11                | 3.81     | 6.30E-04 |
| 80  | GO:0009740 | gibberellic acid mediated signaling pathway                      | 72              | 21                | 10.16    | 7.00E-04 |
| 81  | GO:0007169 | transmembrane receptor protein tyrosine kinase signaling pathway | 113             | 29                | 15.94    | 8.00E-04 |
| 82  | GO:0015824 | proline transport                                                | 68              | 20                | 9.59     | 8.30E-04 |
| 83  | GO:0010227 | floral organ abscission                                          | 32              | 12                | 4.52     | 8.80E-04 |
| 84  | GO:0052541 | plant-type cell wall cellulose metabolic process                 | 24              | 10                | 3.39     | 9.00E-04 |
| 85  | GO:0010158 | abaxial cell fate specification                                  | 7               | 5                 | 0.99     | 9.10E-04 |
| 86  | GO:0009742 | brassinosteroid mediated signaling pathway                       | 37              | 13                | 5.22     | 1.10E-03 |
| 87  | GO:0048767 | root hair elongation                                             | 164             | 38                | 23.14    | 1.17E-03 |
| 88  | GO:0010118 | stomatal movement                                                | 86              | 32                | 12.13    | 1.68E-03 |
| 89  | GO:0009694 | jasmonic acid metabolic process                                  | 147             | 58                | 20.74    | 1.71E-03 |
| 90  | GO:0033500 | carbohydrate homeostasis                                         | 12              | 8                 | 1.69     | 1.74E-03 |
| 91  | GO:0007231 | osmosensory signaling pathway                                    | 5               | 4                 | 0.71     | 1.75E-03 |
| 92  | GO:2000022 | regulation of jasmonic acid mediated signaling pathway           | 5               | 4                 | 0.71     | 1.75E-03 |
| 93  | GO:0010037 | response to carbon dioxide                                       | 5               | 4                 | 0.71     | 1.75E-03 |
| 94  | GO:0009624 | response to nematode                                             | 72              | 20                | 10.16    | 1.80E-03 |
| 95  | GO:0006766 | vitamin metabolic process                                        | 77              | 21                | 10.86    | 1.80E-03 |
| 96  | GO:0006865 | amino acid transport                                             | 228             | 61                | 32.17    | 2.09E-03 |
| 97  | GO:0000038 | very long-chain fatty acid metabolic process                     | 44              | 14                | 6.21     | 2.14E-03 |
| 98  | GO:0046885 | regulation of hormone biosynthetic process                       | 8               | 5                 | 1.13     | 2.15E-03 |
| 99  | GO:0050801 | ion homeostasis                                                  | 205             | 59                | 28.93    | 2.26E-03 |
| 100 | GO:0052546 | cell wall pectin metabolic process                               | 40              | 13                | 5.64     | 2.47E-03 |

### Supplementary Table 1: GO category enrichment analysis of direct WUS targets.

Top 100 enriched categories are shown. As a background set for calculating enrichment, we used genes in open chromatin<sup>28</sup>.

| AGI        | Gene Name | ChIP-seq |    |      |    |      | RNA-seq |           |
|------------|-----------|----------|----|------|----|------|---------|-----------|
|            |           | peaks    | Ac | deAc | Me | deMe | Log2FC  | p adj.    |
| AT1G59750  | ARF1      | 0        | -  | +    | -  | -    | -0.09   | 4.26E-01  |
| AT5G62000  | ARF2      | 1        | +  | -    | -  | -    | -0.14   | 7.01E-02  |
| AT2G33860  | ARF3      | 1        | +  | -    | -  | -    | 0.78    | 2.11E-06  |
| AT5G60450  | ARF4      | 1        | -  | +    | -  | -    | -1.26   | 4.76E-18  |
| AT1G19850  | ARF5      | 1        | -  | -    | -  | -    | 0.86    | 1.25E-04  |
| AT1G30330  | ARF6      | 5        | +  | +    | -  | -    | 0.29    | 1.40E-02  |
| AT5G20730  | ARF7      | 0        | +  | -    | -  | -    | 0.17    | 2.46E-01  |
| AT5G37020  | ARF8      | 1        | -  | -    | -  | -    | -1.58   | 8.52E-20  |
| AT4G23980  | ARF9      | 1        | -  | -    | -  | -    | 1.15    | 5.92E-25  |
| AT2G28350  | ARF10     | 2        | +  | -    | -  | -    | 0.85    | 9.49E-04  |
| AT2G46530  | ARF11     | 1        | -  | -    | -  | +    | 0.93    | 4.27E-07  |
| AT1G34310* | ARF12     | 0        | -  | -    | -  | -    | 0       | 1         |
| AT1G34170* | ARF13     | 0        | -  | -    | -  | -    | 0       | 1         |
| AT1G35540* | ARF14     | 0        | -  | -    | -  | -    | 0       | 1         |
| AT1G35520* | ARF15     | 0        | -  | -    | -  | -    | 0       | 1         |
| AT4G30080  | ARF16     | 0        | +  | -    | -  | -    | 0.14    | 6.29E-01  |
| AT1G77850  | ARF17     | 0        | +  | -    | -  | -    | 0.87    | 4.19E-05  |
| AT3G61830* | ARF18     | 0        | +  | +    | -  | -    | 0.99    | 7.48E-15  |
| AT1G19220  | ARF19     | 0        | +  | -    | -  | -    | 1.12    | 2.96E-09  |
| AT1G35240* | ARF20     | 0        | -  | -    | -  | -    | 0       | 1         |
| AT1G34410* | ARF21     | 0        | -  | -    | -  | -    | 0       | 1         |
| AT1G34390* | ARF22     | 0        | -  | -    | -  | -    | 0       | 1         |
| AT1G43950* | ARF23     | 0        | -  | -    | -  | -    | 0       | 1         |
| AT4G14560  | IAA1      | 1        | -  | -    | -  | -    | -0.03   | 9.48E-01  |
| AT3G23030  | IAA2      | 2        | -  | +    | -  | -    | -0.76   | 2.39E-21  |
| AT1G04240  | SHY2      | 2        | -  | -    | -  | -    | 3.22    | 4.66E-121 |
| AT5G43700  | ATAUX2-11 | 1        | -  | +    | -  | -    | -0.45   | 2.15E-05  |
| AT1G15580* | IAA5      | 0        | -  | -    | -  | -    | 0       | 1         |
| AT1G52830  | IAA6      | 2        | -  | +    | -  | -    | 0       | 1         |
| AT3G23050  | IAA7      | 1        | -  | -    | -  | +    | 0.57    | 4.02E-07  |
| AT2G22670  | IAA8      | 2        | -  | +    | -  | -    | 1.39    | 6.40E-43  |
| AT5G65670  | IAA9      | 2        | -  | -    | -  | -    | 0.12    | 1.41E-01  |
| AT1G04100* | IAA10     | 0        | -  | -    | -  | -    | -1.71   | 2.57E-14  |
| AT4G28640  | IAA11     | 0        | -  | -    | -  | -    | -0.68   | 1.26E-02  |
| AT1G04550  | IAA12     | 1        | -  | -    | -  | -    | -0.56   | 1.27E-02  |
| AT2G33310  | IAA13     | 1        | -  | +    | -  | -    | -1.00   | 2.41E-15  |
| AT4G14550  | IAA14     | 2        | -  | -    | -  | -    | -0.58   | 6.37E-03  |
| AT1G80390  | IAA15     | 0        | -  | -    | -  | +    | 0       | 1         |
| AT3G04730  | IAA16     | 1        | -  | +    | -  | -    | -0.39   | 2.49E-09  |
| AT1G04250  | AXR3      | 1        | -  | -    | -  | +    | 0.67    | 1.70E-04  |
| AT1G51950  | IAA18     | 3        | -  | +    | -  | -    | -0.75   | 2.02E-11  |
| AT3G15540  | IAA19     | 2        | +  | -    | -  | +    | 1.44    | 1.10E-03  |
| AT2G46990  | IAA20     | 1        | -  | -    | -  | +    | 1.93    | 4.30E-16  |
| AT3G16500  | PAP1      | 2        | +  | -    | -  | -    | -1.48   | 1.32E-35  |
| AT4G29080  | PAP2      | 1        | -  | -    | -  | -    | 0.88    | 7.44E-07  |
| AT5G25890  | IAA28     | 0        | -  | +    | -  | -    | -0.28   | 2.54E-01  |
| AT4G32280  | IAA29     | 0        | -  | -    | -  | -    | 1.97    | 3.36E-07  |
| AT3G62100  | IAA30     | 0        | -  | -    | -  | -    | 1.18    | 9.73E-04  |
| AT3G17600* | IAA31     | 0        | -  | -    | -  | -    | 0       | 1         |
| AT2G01200* | IAA32     | 0        | -  | -    | -  | -    | 2.88    | 8.13E-02  |
| AT1G15050* | IAA34     | 0        | +  | -    | -  | -    | -0.44   | 4.35E-01  |
| AT4G03190  | AFB1      | 0        | +  | -    | -  | -    | -1.55   | 3.32E-12  |
| AT3G26810  | AFB2      | 2        | -  | +    | -  | -    | -0.15   | 3.61E-01  |
| AT1G12820  | AFB3      | 0        | +  | +    | -  | -    | 1.20    | 1.29E-40  |
| AT4G24390  | AFB4      | 0        | -  | -    | -  | -    | 0.58    | 1.03E-03  |
| AT5G49980  | AFB5      | 1        | +  | -    | -  | -    | 0.48    | 4.95E-05  |
| AT3G62980  | TIR1      | 1        | -  | +    | -  | -    | -0.87   | 4.91E-18  |
| AT1G73590  | PIN1      | 1        | +  | +    | -  | -    | 0.13    | 7.71E-01  |
| AT5G57090  | PIN2      | 0        | -  | -    | -  | -    | 0.68    | 7.34E-02  |
| AT1G70940  | PIN3      | 2        | +  | +    | -  | -    | -1.17   | 1.85E-27  |
| AT2G01420  | PIN4      | 3        | +  | +    | +  | -    | 0.36    | 2.92E-05  |
| AT5G16530* | PIN5      | 0        | -  | -    | -  | -    | -0.98   | 7.92E-01  |
| AT1G77110  | PIN6      | 1        | -  | +    | -  | +    | 1.57    | 5.68E-02  |
| AT1G23080  | PIN7      | 2        | -  | -    | -  | -    | -0.17   | 3.05E-01  |
| AT5G15100  | PIN8      | 0        | -  | -    | -  | +    | 0       | 1         |
| AT2G38120  | AUX1      | 2        | -  | -    | -  | +    | 0.91    | 3.36E-10  |
| AT5G01240  | LAX1      | 2        | -  | -    | -  | +    | 0.16    | 2.08E-01  |
| AT2G21050  | LAX2      | 0        | -  | -    | -  | -    | 0.46    | 1.45E-01  |
| AT1G77690  | LAX3      | 1        | -  | -    | -  | -    | 0.01    | 9.65E-01  |
| AT2G34650  | PID       | 2        | -  | -    | -  | +    | 0.35    | 1.04E-01  |
| AT2G26700  | PID2      | 0        | -  | -    | -  | -    | -0.11   | 8.31E-01  |

**Supplementary Table 2: Response of genes with activities in auxin signaling to WUS.**

Adjusted p-value for RNA-seq data (WUS-GR, DEX vs. mock) was calculated using the Benjamini-Hochberg method in DESeq2. Asterisks denote genes in regions with closed chromatin<sup>28</sup>. CHIP-seq results for WUS binding, acetylation and methylation are given. Peaks column denotes number of WUS binding events at the locus; Ac denotes increase of acetylation at the locus, deAc denotes reduction in acetylation at the locus; Me denotes increase of methylation at the locus, deMe denotes reduction in methylation at the locus. Processed raw data including read counts can be found in Supplementary File 1.

| AGI       | Gene Name | WUS peaks | Ac | deAc | Me | deMe | Log2FC | p adj.    |
|-----------|-----------|-----------|----|------|----|------|--------|-----------|
| AT3G28970 | AAR3      | 0         | -  | +    | -  | -    | -0.15  | 6.05E-01  |
| AT2G36910 | ABCB1     | 1         | -  | -    | -  | -    | 0.29   | 1.89E-01  |
| AT1G10680 | ABCB10    | 1         | -  | +    | -  | +    | 0      | 1         |
| AT1G27940 | ABCB13    | 0         | -  | -    | -  | -    | 0      | 1         |
| AT1G28010 | ABCB14    | 0         | +  | +    | -  | -    | 0.22   | 3.46E-01  |
| AT3G28345 | ABCB15    | 0         | -  | -    | -  | +    | 2.29   | 2.67E-14  |
| AT3G28360 | ABCB16    | 0         | -  | -    | +  | +    | 0      | 1         |
| AT3G28380 | ABCB17    | 0         | -  | +    | -  | -    | -0.69  | 8.20E-01  |
| AT3G28390 | ABCB18    | 0         | -  | -    | -  | +    | 0      | 1         |
| AT3G28860 | ABCB19    | 2         | +  | +    | -  | -    | -0.55  | 4.02E-04  |
| AT4G25960 | ABCB2     | 0         | +  | -    | -  | -    | 0.75   | 3.93E-07  |
| AT3G55320 | ABCB20    | 0         | -  | -    | -  | -    | 0.48   | 8.69E-03  |
| AT3G62150 | ABCB21    | 0         | -  | -    | -  | -    | -2.94  | 2.89E-108 |
| AT3G28415 | ABCB22    | 0         | -  | -    | -  | +    | 0      | 1         |
| AT5G03910 | ABCB29    | 0         | -  | +    | -  | -    | -0.15  | 1.77E-01  |
| AT2G47000 | ABCB4     | 1         | +  | -    | -  | -    | -0.26  | 3.71E-01  |
| AT2G39480 | ABCB6     | 2         | -  | -    | -  | -    | -0.47  | 1.12E-03  |
| AT1G59870 | ABCG36    | 1         | -  | -    | -  | -    | -1.90  | 3.99E-66  |
| AT3G53480 | ABCG37    | 0         | +  | -    | -  | -    | -0.82  | 3.26E-03  |
| AT1G15520 | ABCG40    | 0         | -  | -    | -  | -    | 0.40   | 5.02E-02  |
| AT4G26080 | ABI1      | 0         | -  | +    | -  | -    | -0.80  | 2.21E-18  |
| AT3G24650 | ABI3      | 1         | +  | -    | -  | +    | 1.14   | 4.23E-01  |
| AT2G05710 | ACO3      | 0         | -  | +    | -  | -    | -0.82  | 6.22E-18  |
| AT2G22810 | ACS4      | 1         | -  | -    | -  | +    | 0      | 1         |
| AT4G11280 | ACS6      | 3         | -  | -    | -  | -    | -0.49  | 5.50E-04  |
| AT5G09810 | ACT7      | 2         | +  | -    | -  | -    | 0.09   | 2.64E-01  |
| AT4G16420 | ADA2B     | 0         | +  | -    | -  | -    | 0.22   | 1.55E-02  |
| AT1G69260 | AFP1      | 1         | -  | -    | -  | -    | 0.55   | 6.83E-02  |
| AT5G13300 | AGD3      | 1         | -  | +    | -  | -    | 0.32   | 1.14E-03  |
| AT5G13790 | AGL15     | 1         | -  | -    | -  | -    | -1.01  | 8.44E-05  |
| AT1G48410 | AGO1      | 1         | -  | -    | -  | +    | 0.49   | 2.22E-07  |
| AT2G35270 | AHL21     | 0         | -  | -    | -  | -    | -1.04  | 3.21E-01  |
| AT2G46510 | AIB       | 1         | -  | -    | -  | -    | 0.38   | 1.73E-02  |
| AT5G57390 | AIL5      | 0         | -  | -    | -  | +    | -0.04  | 9.04E-01  |
| AT5G10510 | AIL6      | 1         | -  | -    | -  | +    | -0.55  | 2.46E-01  |
| AT5G65510 | AIL7      | 1         | -  | -    | -  | -    | -0.21  | 9.10E-01  |
| AT4G12550 | AIR1      | 0         | -  | -    | -  | +    | -5.02  | 6.48E-03  |
| AT3G07390 | AIR12     | 2         | -  | -    | -  | -    | 1.13   | 9.55E-24  |
| AT2G04160 | AIR3      | 2         | -  | -    | -  | +    | -1.50  | 1.00E-13  |
| AT2G34680 | AIR9      | 0         | -  | -    | -  | -    | -0.05  | 8.38E-01  |
| AT1G54100 | ALDH7B4   | 1         | -  | +    | -  | -    | 1.12   | 2.98E-82  |
| AT2G17800 | ARAC1     | 0         | -  | -    | -  | -    | -0.05  | 8.48E-01  |
| AT1G59750 | ARF1      | 0         | -  | +    | -  | -    | -0.09  | 4.26E-01  |
| AT2G28350 | ARF10     | 2         | +  | -    | -  | -    | 0.85   | 9.49E-04  |
| AT4G30080 | ARF16     | 0         | +  | -    | -  | -    | 0.14   | 6.29E-01  |
| AT1G77850 | ARF17     | 0         | +  | -    | -  | -    | 0.87   | 4.19E-05  |
| AT1G19220 | ARF19     | 0         | +  | -    | -  | -    | 1.12   | 2.96E-09  |
| AT2G33860 | ARF3      | 1         | +  | -    | -  | -    | 0.78   | 2.11E-06  |
| AT1G19850 | ARF5      | 1         | -  | -    | -  | -    | 0.86   | 1.25E-04  |
| AT1G30330 | ARF6      | 5         | +  | +    | -  | -    | 0.29   | 1.40E-02  |
| AT5G37020 | ARF8      | 1         | -  | -    | -  | -    | -1.58  | 8.52E-20  |
| AT3G59900 | ARGOS     | 1         | -  | -    | -  | -    | -4.69  | 4.35E-18  |
| AT2G37630 | AS1       | 1         | +  | -    | -  | -    | 0.30   | 4.03E-01  |
| AT5G05730 | ASA1      | 1         | -  | -    | -  | -    | -1.38  | 6.94E-19  |
| AT1G54060 | ASIL1     | 0         | -  | -    | -  | -    | -0.16  | 3.42E-01  |
| AT4G18710 | ASK7      | 3         | -  | -    | -  | -    | -0.92  | 2.63E-35  |
| AT5G19140 | ATAILP1   | 2         | -  | -    | -  | -    | 0.69   | 2.82E-15  |
| AT3G01220 | ATHB-20   | 0         | -  | +    | -  | +    | -0.29  | 7.71E-01  |
| AT5G66700 | ATHB-53   | 1         | -  | -    | -  | -    | -2.31  | 1.35E-06  |
| AT4G32880 | ATHB-8    | 0         | -  | +    | -  | +    | -0.50  | 1.44E-02  |
| AT5G27420 | ATL31     | 1         | -  | -    | -  | -    | -0.32  | 5.80E-03  |
| AT2G46070 | ATMPK12   | 0         | -  | -    | -  | -    | 0.77   | 8.82E-08  |
| AT4G21440 | ATMYB102  | 2         | -  | -    | -  | +    | 0.24   | 5.42E-01  |
| AT5G15310 | ATMYB16   | 1         | -  | -    | -  | -    | 1.70   | 6.56E-29  |
| AT2G47190 | ATMYB2    | 1         | -  | -    | -  | -    | -0.70  | 5.42E-03  |
| AT1G57560 | ATMYB50   | 0         | -  | -    | -  | -    | 0      | 1         |
| AT4G05100 | ATMYB74   | 2         | -  | -    | +  | -    | -0.35  | 6.17E-01  |
| AT1G34670 | ATMYB93   | 0         | -  | -    | +  | -    | 2.03   | 3.11E-01  |
| AT2G26740 | ATSEH     | 1         | -  | -    | -  | -    | -1.97  | 5.66E-95  |
| AT3G22650 | ATSFL61   | 0         | -  | -    | -  | -    | 0      | 1         |
| AT2G38120 | AUX1      | 2         | -  | -    | -  | +    | 0.91   | 3.36E-10  |
| AT2G32410 | AXL1      | 1         | -  | -    | -  | -    | -0.24  | 3.72E-01  |
| AT1G05180 | AXR1      | 0         | -  | +    | -  | -    | -0.23  | 1.58E-02  |
| AT1G54990 | AXR4      | 1         | -  | +    | -  | -    | -1.52  | 3.09E-06  |
| AT3G19580 | AZF2      | 1         | -  | -    | -  | -    | 1.53   | 4.36E-16  |
| AT1G27740 | BHLH54    | 0         | -  | +    | -  | -    | 0      | 1         |
| AT4G33880 | BHLH85    | 0         | -  | -    | -  | -    | 0      | 1         |
| AT3G02260 | BIG       | 1         | -  | -    | -  | +    | -0.26  | 5.70E-01  |
| AT2G35940 | BLH1      | 4         | -  | +    | -  | -    | -1.72  | 2.08E-30  |
| AT2G01950 | BRL2      | 0         | -  | -    | -  | -    | -0.03  | 9.11E-01  |



| AGI       | Gene Name | WUS peaks | Ac | deAc | Me | deMe | Log2FC | p adj.   |
|-----------|-----------|-----------|----|------|----|------|--------|----------|
| AT5G63160 | BT1       | 4         | -  | -    | -  | -    | -0.33  | 1.01E-03 |
| AT3G48360 | BT2       | 3         | +  | -    | -  | -    | 0.45   | 4.86E-09 |
| AT5G67480 | BT4       | 1         | -  | -    | -  | -    | 1.37   | 3.24E-30 |
| AT4G37610 | BT5       | 2         | +  | -    | -  | -    | 1.26   | 1.14E-21 |
| AT2G02560 | CAND1     | 0         | -  | +    | -  | -    | 0.25   | 4.26E-02 |
| AT5G01490 | CAX4      | 0         | -  | -    | +  | +    | -2.48  | 2.56E-03 |
| AT4G17615 | CBL1      | 2         | -  | -    | -  | -    | -1.32  | 1.65E-14 |
| AT2G46830 | CCA1      | 0         | -  | -    | -  | -    | -0.78  | 1.23E-10 |
| AT4G32810 | CCD8      | 0         | -  | -    | -  | -    | -0.72  | 7.05E-02 |
| AT2G20000 | CDC27B    | 0         | -  | +    | -  | -    | 0.61   | 2.63E-06 |
| AT3G55120 | CHI1      | 1         | -  | -    | -  | -    | 0.76   | 1.46E-02 |
| AT3G07370 | CHIP      | 1         | -  | +    | -  | -    | 0.42   | 2.20E-06 |
| AT5G13930 | CHS       | 1         | +  | -    | +  | -    | 0.63   | 4.65E-01 |
| AT5G65940 | CHY1      | 0         | -  | -    | -  | -    | -0.10  | 4.00E-01 |
| AT5G37770 | CML24     | 0         | +  | -    | -  | -    | 0.94   | 4.28E-04 |
| AT5G20990 | CNX1      | 0         | -  | -    | -  | -    | -0.79  | 7.46E-22 |
| AT4G10100 | CNX7      | 0         | +  | -    | -  | -    | -0.99  | 2.03E-08 |
| AT1G18890 | CPK10     | 0         | +  | +    | -  | -    | 0.22   | 3.83E-02 |
| AT3G57530 | CPK32     | 3         | -  | -    | -  | -    | -0.51  | 6.10E-08 |
| AT2G17290 | CPK6      | 2         | +  | -    | -  | -    | 0.32   | 2.70E-03 |
| AT5G01270 | CPL2      | 1         | -  | -    | -  | -    | 0.16   | 3.04E-01 |
| AT1G22920 | CSN5A     | 1         | -  | +    | -  | -    | -0.54  | 1.59E-06 |
| AT1G71230 | CSN5B     | 0         | -  | -    | -  | -    | 2.56   | 2.36E-03 |
| AT4G02570 | CUL1      | 0         | +  | -    | -  | -    | -0.26  | 1.44E-03 |
| AT2G26710 | CYP734A1  | 2         | +  | -    | -  | -    | 1.32   | 6.53E-29 |
| AT5G07990 | CYP75B1   | 1         | +  | +    | -  | -    | 0.47   | 3.03E-01 |
| AT2G27690 | CYP94C1   | 0         | -  | -    | -  | -    | -0.30  | 1.61E-01 |
| AT4G03400 | DFL2      | 2         | -  | +    | -  | -    | -3.71  | 1.80E-83 |
| AT3G50410 | DOF3.4    | 0         | -  | +    | -  | -    | -1.09  | 1.64E-03 |
| AT1G09700 | DRB1      | 0         | -  | -    | -  | -    | 0.82   | 1.29E-03 |
| AT5G22220 | E2FB      | 0         | -  | -    | -  | -    | -0.04  | 8.48E-01 |
| AT5G14960 | E2FD      | 0         | -  | -    | -  | -    | 1.65   | 3.47E-08 |
| AT4G14430 | ECI2      | 1         | -  | +    | -  | -    | 0.36   | 4.75E-03 |
| AT2G19560 | EER5      | 0         | -  | -    | -  | -    | -0.03  | 8.60E-01 |
| AT1G73730 | EIL3      | 0         | -  | -    | -  | -    | 0.55   | 6.23E-05 |
| AT3G20770 | EIN3      | 0         | -  | -    | -  | -    | 0.23   | 4.34E-03 |
| AT2G25930 | ELF3      | 0         | -  | -    | -  | -    | 0.31   | 3.39E-03 |
| AT5G13680 | ELP1      | 0         | +  | -    | -  | -    | 0.20   | 2.61E-01 |
| AT3G11220 | ELP4      | 0         | +  | -    | -  | -    | 0.12   | 6.05E-01 |
| AT1G28370 | ERF11     | 1         | +  | -    | -  | -    | 2.24   | 2.86E-27 |
| AT2G44840 | ERF13     | 1         | -  | +    | -  | +    | 2.11   | 9.22E-13 |
| AT1G24590 | ESR2      | 0         | +  | -    | -  | +    | -1.42  | 4.50E-01 |
| AT1G66340 | ETR1      | 0         | -  | -    | -  | -    | -0.30  | 9.46E-04 |
| AT1G27340 | FBX6      | 1         | -  | +    | -  | -    | -2.18  | 7.88E-41 |
| AT1G26870 | FEZ       | 0         | +  | -    | -  | -    | 0      | 1        |
| AT5G08640 | FLS1      | 0         | -  | -    | -  | -    | 1.95   | 1.51E-01 |
| AT5G54500 | FQR1      | 2         | -  | -    | -  | -    | 0.89   | 1.04E-16 |
| AT3G26790 | FUS3      | 0         | -  | +    | -  | -    | 2.16   | 9.74E-02 |
| AT2G46270 | GBF3      | 0         | +  | -    | -  | -    | 0.63   | 1.33E-07 |
| AT1G61120 | GES       | 0         | -  | -    | -  | -    | -2.64  | 1.24E-03 |
| AT2G39550 | GGB       | 1         | -  | -    | -  | -    | -0.32  | 1.45E-02 |
| AT2G14960 | GH3.1     | 0         | -  | -    | -  | +    | -0.28  | 9.15E-01 |
| AT1G28130 | GH3.17    | 2         | -  | -    | -  | -    | -0.39  | 9.13E-03 |
| AT2G23170 | GH3.3     | 0         | -  | +    | -  | -    | -0.93  | 1.67E-05 |
| AT1G59500 | GH3.4     | 0         | -  | -    | -  | -    | 0      | 1        |
| AT4G27260 | GH3.5     | 3         | -  | -    | -  | -    | -0.48  | 4.82E-07 |
| AT5G54510 | GH3.6     | 1         | -  | +    | -  | -    | 2.81   | 2.19E-46 |
| AT2G47750 | GH3.9     | 0         | -  | -    | -  | -    | 0.96   | 9.34E-02 |
| AT3G63010 | GID1B     | 3         | -  | -    | -  | -    | -1.83  | 2.95E-51 |
| AT4G32690 | GLB3      | 1         | -  | -    | -  | -    | -1.08  | 7.55E-08 |
| AT4G03190 | GRH1      | 0         | +  | -    | -  | -    | -1.55  | 3.32E-12 |
| AT1G28480 | GRXC9     | 1         | -  | -    | -  | -    | 1.82   | 1.35E-17 |
| AT5G50320 | HAG3      | 0         | +  | +    | -  | -    | -0.46  | 2.86E-05 |
| AT5G47370 | HAT2      | 3         | -  | -    | -  | -    | 0.31   | 1.55E-01 |
| AT4G16780 | HAT4      | 3         | -  | -    | -  | -    | -1.77  | 3.79E-24 |
| AT4G36740 | HB-5      | 0         | -  | +    | -  | -    | 2.90   | 6.73E-07 |
| AT4G37580 | HLS1      | 2         | +  | -    | -  | -    | -0.26  | 3.16E-01 |
| AT5G45710 | HSFA4C    | 0         | -  | -    | -  | -    | 0.08   | 6.97E-01 |
| AT4G14560 | IAA1      | 1         | -  | -    | -  | -    | -0.03  | 9.48E-01 |
| AT1G04100 | IAA10     | 0         | -  | -    | -  | -    | -1.71  | 2.57E-14 |
| AT4G28640 | IAA11     | 0         | -  | -    | -  | -    | -0.68  | 1.26E-02 |
| AT1G04550 | IAA12     | 1         | -  | -    | -  | -    | -0.56  | 1.27E-02 |
| AT2G33310 | IAA13     | 1         | -  | +    | -  | -    | -1.00  | 2.41E-15 |
| AT4G14550 | IAA14     | 2         | -  | -    | -  | -    | -0.58  | 6.37E-03 |
| AT1G80390 | IAA15     | 0         | -  | -    | -  | +    | 0      | 1        |
| AT3G04730 | IAA16     | 1         | -  | +    | -  | -    | -0.39  | 2.49E-09 |
| AT1G04250 | IAA17     | 1         | -  | -    | -  | +    | 0.67   | 1.70E-04 |
| AT1G51950 | IAA18     | 3         | -  | +    | -  | -    | -0.75  | 2.02E-11 |
| AT3G15540 | IAA19     | 2         | +  | -    | -  | +    | 1.44   | 1.10E-03 |
| AT3G23030 | IAA2      | 2         | -  | +    | -  | -    | -0.76  | 2.39E-21 |

| AGI       | Gene Name | WUS peaks | Ac | deAc | Me | deMe | Log2FC | p adj.   |
|-----------|-----------|-----------|----|------|----|------|--------|----------|
| AT2G46990 | IAA20     | 1         | -  | -    | -  | +    | 1.93   | 4.30E-16 |
| AT3G16500 | IAA26     | 2         | +  | -    | -  | -    | -1.48  | 1.32E-35 |
| AT4G29080 | IAA27     | 1         | -  | -    | -  | -    | 0.88   | 7.44E-07 |
| AT5G25890 | IAA28     | 0         | -  | +    | -  | -    | -0.28  | 2.54E-01 |
| AT4G32280 | IAA29     | 0         | -  | -    | -  | -    | 1.97   | 3.36E-07 |
| AT3G62100 | IAA30     | 0         | -  | -    | -  | -    | 1.18   | 9.73E-04 |
| AT3G17600 | IAA31     | 0         | -  | -    | -  | -    | 0      | 1        |
| AT2G01200 | IAA32     | 0         | -  | -    | -  | -    | 2.88   | 8.13E-02 |
| AT5G57420 | IAA33     | 0         | -  | +    | -  | +    | 0      | 1        |
| AT1G15050 | IAA34     | 0         | +  | -    | -  | -    | -0.44  | 4.35E-01 |
| AT5G43700 | IAA4      | 1         | -  | +    | -  | -    | -0.45  | 2.15E-05 |
| AT1G15580 | IAA5      | 0         | -  | -    | -  | -    | 0      | 1        |
| AT1G52830 | IAA6      | 2         | -  | +    | -  | -    | 0      | 1        |
| AT3G23050 | IAA7      | 1         | -  | -    | -  | +    | 0.57   | 4.02E-07 |
| AT2G22670 | IAA8      | 2         | -  | +    | -  | -    | 1.39   | 6.40E-43 |
| AT5G65670 | IAA9      | 2         | -  | -    | -  | -    | 0.12   | 1.41E-01 |
| AT2G04550 | IBR5      | 0         | -  | -    | -  | -    | 0.28   | 1.84E-02 |
| AT1G47510 | IP5P11    | 1         | -  | -    | -  | -    | -1.90  | 6.10E-08 |
| AT4G18010 | IP5P2     | 4         | -  | -    | -  | -    | -1.04  | 3.42E-12 |
| AT2G22240 | IPS2      | 0         | +  | -    | -  | -    | 1.13   | 2.29E-14 |
| AT4G19690 | IRT1      | 0         | -  | -    | -  | -    | 0      | 1        |
| AT2G46370 | JAR1      | 2         | -  | -    | -  | -    | -0.76  | 6.78E-13 |
| AT5G13220 | JAZ10     | 1         | -  | -    | -  | -    | 2.12   | 4.86E-30 |
| AT1G19640 | JMT       | 2         | -  | -    | -  | -    | 0      | 1        |
| AT5G49720 | KOR       | 1         | -  | +    | -  | -    | -0.35  | 2.80E-07 |
| AT1G77690 | LAX3      | 1         | -  | -    | -  | -    | 0.01   | 9.65E-01 |
| AT3G58190 | LBD29     | 0         | -  | -    | -  | -    | 0      | 1        |
| AT1G01060 | LHY       | 1         | -  | -    | -  | -    | -0.20  | 6.39E-01 |
| AT5G06300 | LOG7      | 5         | -  | +    | -  | -    | 0.01   | 9.73E-01 |
| AT5G12330 | LRP1      | 2         | +  | -    | -  | +    | 0.09   | 8.26E-01 |
| AT4G20380 | LSD1      | 0         | +  | -    | -  | -    | 0.39   | 2.24E-04 |
| AT2G39370 | MAKR4     | 0         | -  | -    | -  | -    | 0      | 1        |
| AT3G09940 | MDAR3     | 0         | -  | -    | -  | +    | -2.00  | 4.29E-02 |
| AT1G74660 | MIF1      | 0         | -  | -    | -  | -    | 1.14   | 3.39E-03 |
| AT1G10210 | MPK1      | 0         | +  | -    | -  | -    | -0.16  | 3.04E-01 |
| AT1G01560 | MPK11     | 0         | +  | -    | -  | -    | 2.01   | 1.50E-40 |
| AT4G01370 | MPK4      | 0         | -  | +    | -  | -    | 0.28   | 7.86E-03 |
| AT2G43790 | MPK6      | 1         | -  | -    | -  | -    | -0.91  | 3.41E-29 |
| AT3G06490 | MYB108    | 2         | -  | -    | -  | -    | -2.35  | 2.86E-09 |
| AT3G55730 | MYB109    | 1         | -  | -    | -  | -    | 1.12   | 4.18E-05 |
| AT2G47460 | MYB12     | 1         | -  | -    | -  | +    | 0      | 1        |
| AT2G31180 | MYB14     | 0         | -  | -    | -  | +    | 0      | 1        |
| AT3G23250 | MYB15     | 2         | -  | -    | -  | +    | -2.72  | 1.40E-16 |
| AT1G22640 | MYB3      | 2         | -  | +    | -  | -    | -1.50  | 3.49E-16 |
| AT3G28910 | MYB30     | 3         | -  | -    | -  | -    | 1.26   | 4.36E-16 |
| AT5G67300 | MYB44     | 3         | -  | -    | -  | -    | 1.45   | 6.93E-22 |
| AT1G18570 | MYB51     | 3         | -  | +    | -  | +    | -0.88  | 1.61E-08 |
| AT5G59780 | MYB59     | 2         | -  | -    | -  | -    | -1.03  | 2.21E-02 |
| AT1G09540 | MYB61     | 1         | -  | -    | -  | -    | -0.89  | 5.37E-01 |
| AT1G56650 | MYB75     | 1         | -  | -    | -  | -    | 1.83   | 1.39E-01 |
| AT5G07700 | MYB76     | 1         | -  | +    | -  | -    | 0      | 1        |
| AT3G47600 | MYB94     | 1         | -  | -    | -  | +    | 0.64   | 2.08E-04 |
| AT1G52890 | NAC019    | 2         | -  | +    | -  | -    | -0.21  | 3.78E-01 |
| AT1G56010 | NAC021    | 2         | -  | -    | -  | -    | -0.47  | 1.24E-01 |
| AT3G15500 | NAC055    | 2         | +  | -    | -  | +    | -0.13  | 3.37E-01 |
| AT5G39610 | NAC92     | 2         | -  | +    | -  | -    | -0.15  | 3.46E-01 |
| AT5G63310 | NDPK2     | 0         | -  | -    | -  | -    | 0.68   | 1.17E-10 |
| AT2G34720 | NFYA4     | 1         | +  | -    | -  | +    | 0.11   | 5.46E-01 |
| AT1G31880 | NLM9      | 1         | -  | -    | -  | -    | 1.44   | 2.45E-10 |
| AT1G32450 | NPF7.3    | 0         | -  | +    | -  | -    | -0.41  | 2.46E-01 |
| AT5G20730 | NPH4      | 0         | +  | -    | -  | -    | 0.17   | 2.46E-01 |
| AT1G80680 | NUP96     | 0         | -  | +    | -  | -    | 0.06   | 7.11E-01 |
| AT2G06050 | OPR3      | 1         | +  | -    | -  | -    | 0.91   | 1.13E-20 |
| AT5G54490 | PBP1      | 0         | -  | -    | -  | -    | 0.84   | 4.32E-03 |
| AT5G64890 | PEP2      | 0         | -  | -    | -  | -    | -4.68  | 2.22E-02 |
| AT5G56290 | PEX5      | 1         | -  | -    | -  | -    | -0.28  | 6.52E-03 |
| AT5G40770 | PHB3      | 0         | -  | -    | -  | -    | -0.33  | 5.54E-04 |
| AT2G34650 | PID       | 2         | -  | -    | -  | +    | 0.35   | 1.04E-01 |
| AT2G43010 | PIF4      | 2         | -  | -    | -  | -    | 1.79   | 1.26E-75 |
| AT3G59060 | PIF5      | 3         | -  | -    | -  | -    | -0.75  | 1.01E-22 |
| AT1G73590 | PIN1      | 1         | +  | +    | -  | -    | 0.13   | 7.71E-01 |
| AT5G57090 | PIN2      | 0         | -  | -    | -  | -    | 0.68   | 7.34E-02 |
| AT1G70940 | PIN3      | 2         | +  | +    | -  | -    | -1.17  | 1.85E-27 |
| AT5G15100 | PIN8      | 0         | -  | -    | -  | +    | 0      | 1        |
| AT2G25170 | PKL       | 0         | -  | +    | -  | -    | 0.27   | 1.60E-02 |
| AT2G19690 | PLA2-BETA | 0         | +  | -    | -  | -    | 2.18   | 2.28E-01 |
| AT3G05630 | PLPZETA2  | 1         | +  | -    | -  | -    | -1.43  | 1.83E-05 |
| AT4G39403 | PLS       | 3         | -  | -    | -  | -    | 3.03   | 2.12E-01 |
| AT1G25490 | PP2AA1    | 0         | +  | +    | -  | -    | -0.27  | 5.88E-03 |
| AT4G29940 | PRH       | 1         | +  | +    | -  | -    | -0.13  | 2.15E-01 |

| AGI       | Gene Name | WUS peaks | Ac | deAc | Me | deMe | Log2FC | p adj.    |
|-----------|-----------|-----------|----|------|----|------|--------|-----------|
| AT3G62680 | PRP3      | 0         | -  | +    | -  | +    | 0      | 1         |
| AT3G21110 | PUR7      | 0         | -  | -    | -  | -    | 0.21   | 3.13E-01  |
| AT2G41820 | PXC3      | 2         | -  | -    | -  | -    | -1.78  | 1.49E-03  |
| AT1G06400 | RABA1A    | 0         | +  | -    | -  | -    | -0.09  | 5.72E-01  |
| AT1G64060 | RBOHF     | 2         | +  | +    | -  | -    | 0.09   | 7.26E-01  |
| AT1G32230 | RCD1      | 1         | -  | +    | -  | -    | -0.61  | 2.11E-09  |
| AT4G36800 | RCE1      | 1         | -  | -    | -  | -    | -0.61  | 6.63E-12  |
| AT4G27410 | RD26      | 0         | +  | -    | -  | -    | 2.38   | 1.17E-113 |
| AT2G01570 | RGA       | 3         | +  | +    | -  | -    | -2.17  | 1.11E-44  |
| AT3G26090 | RGS1      | 0         | -  | -    | -  | -    | -1.33  | 5.83E-19  |
| AT1G78570 | RHM1      | 1         | +  | +    | -  | -    | 0.41   | 4.09E-03  |
| AT5G20570 | ROC1      | 0         | -  | +    | -  | -    | -0.39  | 4.95E-04  |
| AT1G69270 | RPK1      | 1         | -  | -    | -  | -    | -1.64  | 3.08E-05  |
| AT3G53020 | RPL24B    | 0         | +  | -    | -  | -    | -0.50  | 4.28E-05  |
| AT4G38630 | RPN10     | 1         | -  | +    | -  | -    | -0.23  | 4.87E-03  |
| AT1G64520 | RPN12A    | 1         | -  | -    | -  | -    | -0.30  | 7.15E-03  |
| AT3G14050 | RSH2      | 1         | -  | +    | -  | -    | 0.23   | 3.32E-02  |
| AT1G31340 | RUB1      | 1         | -  | -    | -  | -    | -1.02  | 1.11E-16  |
| AT5G17300 | RVE1      | 1         | -  | +    | -  | -    | -1.13  | 1.26E-12  |
| AT5G37260 | RVE2      | 1         | -  | -    | -  | -    | 1.64   | 1.26E-29  |
| AT5G02840 | RVE4      | 0         | -  | -    | -  | -    | -0.84  | 1.25E-10  |
| AT4G01280 | RVE5      | 0         | -  | -    | -  | -    | 0.22   | 9.55E-02  |
| AT3G09600 | RVE8      | 1         | -  | -    | -  | -    | -1.21  | 7.36E-20  |
| AT5G59220 | SAG113    | 4         | -  | -    | -  | +    | -1.48  | 5.36E-03  |
| AT3G28210 | SAP12     | 1         | -  | +    | -  | -    | 0.72   | 2.18E-10  |
| AT1G33410 | SAR1      | 0         | +  | -    | -  | -    | 0.24   | 6.46E-02  |
| AT4G38850 | SAUR15    | 1         | -  | -    | -  | -    | 0      | 1         |
| AT5G18010 | SAUR19    | 1         | -  | -    | -  | -    | 0      | 1         |
| AT5G18020 | SAUR20    | 1         | -  | -    | -  | -    | 0      | 1         |
| AT5G18030 | SAUR21    | 1         | -  | -    | -  | -    | 0.08   | 9.64E-01  |
| AT5G18050 | SAUR22    | 0         | -  | -    | -  | -    | 0      | 1         |
| AT5G18060 | SAUR23    | 0         | -  | -    | -  | -    | 0      | 1         |
| AT5G18080 | SAUR24    | 1         | -  | -    | -  | -    | 0.57   | 8.41E-01  |
| AT3G03830 | SAUR28    | 1         | -  | +    | -  | -    | 0      | 1         |
| AT2G46690 | SAUR32    | 1         | -  | -    | -  | -    | -0.86  | 1.06E-06  |
| AT2G45210 | SAUR36    | 2         | -  | -    | -  | +    | -1.82  | 9.59E-14  |
| AT1G79130 | SAUR40    | 0         | -  | -    | -  | -    | -2.95  | 2.72E-01  |
| AT1G16510 | SAUR41    | 1         | -  | -    | -  | -    | 0.41   | 7.28E-01  |
| AT4G34760 | SAUR50    | 1         | -  | -    | -  | -    | -1.83  | 1.42E-02  |
| AT1G29430 | SAUR62    | 0         | -  | -    | -  | -    | 0      | 1         |
| AT1G29440 | SAUR63    | 1         | -  | -    | -  | -    | -4.15  | 7.16E-02  |
| AT1G29450 | SAUR64    | 0         | -  | -    | -  | -    | -1.41  | 3.27E-01  |
| AT1G29500 | SAUR66    | 1         | -  | -    | -  | -    | -0.98  | 5.70E-01  |
| AT1G29510 | SAUR67    | 0         | -  | -    | -  | -    | -5.26  | 6.53E-04  |
| AT1G29490 | SAUR68    | 0         | -  | -    | -  | -    | 0      | 1         |
| AT1G56150 | SAUR71    | 1         | -  | -    | -  | -    | 1.63   | 4.98E-02  |
| AT3G12830 | SAUR72    | 2         | -  | -    | -  | -    | 0.47   | 3.51E-01  |
| AT4G05530 | SDRA      | 0         | -  | -    | -  | -    | -0.54  | 1.33E-04  |
| AT4G23570 | SGT1A     | 1         | -  | -    | -  | -    | -0.38  | 1.03E-08  |
| AT4G11260 | SGT1B     | 0         | -  | +    | -  | -    | -0.62  | 2.20E-14  |
| AT1G04240 | SHY2      | 2         | -  | -    | -  | -    | 3.22   | 4.66E-121 |
| AT1G16540 | SIR3      | 0         | -  | -    | -  | -    | 0.02   | 9.13E-01  |
| AT1G21410 | SKP2A     | 0         | +  | -    | -  | -    | 0.74   | 1.99E-07  |
| AT4G13520 | SMAP1     | 1         | -  | -    | -  | -    | -0.31  | 2.47E-02  |
| AT3G24280 | SMAP2     | 0         | -  | -    | -  | -    | 0      | 1         |
| AT4G16890 | SNC1      | 1         | +  | +    | -  | -    | 0.06   | 6.58E-01  |
| AT1G74100 | SOT16     | 0         | +  | -    | -  | -    | 0.41   | 1.82E-01  |
| AT4G34710 | SPE2      | 4         | -  | +    | -  | -    | -0.58  | 1.69E-03  |
| AT1G28560 | SRD2      | 0         | -  | -    | -  | -    | 0.37   | 5.95E-01  |
| AT3G11820 | SYP121    | 1         | -  | +    | -  | -    | 0.43   | 7.88E-07  |
| AT3G52400 | SYP122    | 1         | -  | -    | -  | -    | -0.31  | 5.37E-02  |
| AT2G24850 | TAT3      | 0         | -  | -    | -  | -    | 0.93   | 5.57E-01  |
| AT1G53230 | TCP3      | 1         | -  | -    | -  | -    | -0.19  | 8.18E-01  |
| AT3G16640 | TCTP1     | 0         | -  | -    | -  | -    | -0.29  | 1.07E-02  |
| AT5G06960 | TGA5      | 0         | -  | -    | -  | -    | 0.60   | 8.92E-06  |
| AT2G34600 | TIFY      | 1         | -  | -    | -  | -    | -0.28  | 2.89E-01  |
| AT1G19180 | TIFY10A   | 2         | -  | -    | -  | -    | 1.45   | 1.83E-18  |
| AT1G74950 | TIFY10B   | 1         | -  | -    | -  | -    | -0.83  | 1.73E-22  |
| AT1G17380 | TIFY11A   | 1         | +  | -    | -  | -    | 1.46   | 3.54E-11  |
| AT3G62980 | TIR1      | 1         | -  | +    | -  | -    | -0.87  | 4.91E-18  |
| AT1G15750 | TPL       | 1         | +  | -    | -  | -    | -0.30  | 2.25E-03  |
| AT1G08030 | TPST      | 1         | +  | -    | -  | -    | -0.05  | 7.43E-01  |
| AT1G49950 | TRB1      | 0         | -  | -    | -  | -    | 0.23   | 3.47E-02  |
| AT5G67580 | TRB2      | 0         | +  | -    | -  | -    | 1.04   | 1.93E-28  |
| AT3G49850 | TRB3      | 0         | -  | -    | -  | -    | -0.02  | 9.45E-01  |
| AT5G59430 | TRP1      | 1         | -  | +    | -  | -    | 0.96   | 4.91E-20  |
| AT5G42980 | TRX3      | 0         | -  | -    | -  | -    | -0.47  | 7.51E-10  |
| AT5G24520 | TTG1      | 1         | +  | -    | -  | -    | -0.45  | 6.43E-06  |
| AT2G42580 | TTL3      | 1         | +  | -    | -  | -    | -0.12  | 2.04E-01  |
| AT3G20830 | UCNL      | 2         | +  | -    | -  | +    | 1.28   | 1.88E-08  |

| AGI       | Gene Name | WUS peaks | Ac | deAc | Me | deMe | Log2FC | p adj.    |
|-----------|-----------|-----------|----|------|----|------|--------|-----------|
| AT4G00080 | UNE11     | 0         | -  | -    | -  | -    | 0      | 1         |
| AT3G63300 | VAB       | 0         | -  | +    | -  | -    | -2.48  | 3.84E-15  |
| AT3G13300 | VCS       | 0         | -  | -    | -  | -    | 0.11   | 4.17E-01  |
| AT1G14000 | VIK       | 0         | -  | +    | -  | -    | 0.22   | 7.50E-02  |
| AT5G55120 | VTC5      | 1         | +  | -    | -  | -    | 1.37   | 2.91E-23  |
| AT3G11260 | WOX5      | 0         | -  | -    | -  | +    | -1.19  | 5.39E-01  |
| AT2G47260 | WRKY23    | 2         | +  | +    | -  | -    | -0.68  | 6.96E-02  |
| AT5G57740 | XBAT32    | 0         | -  | +    | -  | -    | 0.92   | 1.18E-03  |
| AT4G34390 | XLG2      | 0         | +  | -    | -  | -    | 0.10   | 5.00E-01  |
| AT5G57560 | XTH22     | 3         | +  | -    | -  | -    | -0.30  | 5.39E-02  |
| AT2G06850 | XTH4      | 2         | -  | -    | -  | -    | -0.47  | 5.33E-08  |
| AT4G37390 | YDK1      | 1         | -  | -    | -  | -    | 3.61   | 3.69E-169 |
| AT5G51640 | YLS7      | 0         | -  | -    | -  | -    | 0.22   | 3.22E-01  |
| AT1G27730 | ZAT10     | 3         | +  | -    | -  | -    | -1.81  | 1.46E-35  |
| AT5G51470 |           | 0         | -  | +    | +  | +    | 0      | 1         |
| AT3G20220 |           | 0         | -  | -    | -  | -    | 0      | 1         |
| AT2G37030 |           | 0         | -  | -    | -  | -    | 1.35   | 4.92E-01  |
| AT4G34810 |           | 0         | -  | -    | -  | -    | -6.84  | 6.66E-14  |
| AT1G19840 |           | 0         | +  | -    | -  | -    | 1.30   | 5.24E-01  |
| AT4G34770 |           | 1         | -  | -    | -  | -    | -5.89  | 8.70E-10  |
| AT1G63720 |           | 1         | +  | -    | -  | -    | 0.68   | 9.03E-05  |
| AT3G43120 |           | 0         | -  | -    | -  | -    | 0      | 1         |
| AT1G19830 |           | 0         | -  | -    | -  | +    | -3.36  | 6.43E-02  |
| AT4G38840 |           | 1         | -  | -    | -  | -    | -3.31  | 2.26E-03  |
| AT3G26760 |           | 0         | -  | +    | -  | +    | -1.92  | 2.90E-17  |
| AT1G48670 |           | 0         | -  | +    | -  | -    | 0      | 1         |
| AT1G17520 |           | 0         | -  | -    | -  | -    | -0.18  | 1.36E-01  |
| AT1G70000 |           | 1         | -  | -    | -  | -    | -2.22  | 1.93E-11  |
| AT5G20820 |           | 0         | -  | -    | -  | -    | 0      | 1         |
| AT3G51200 |           | 0         | -  | -    | -  | -    | 0      | 1         |
| AT5G13380 |           | 0         | -  | -    | -  | -    | 0      | 1         |
| AT2G21210 |           | 2         | -  | -    | -  | -    | -0.47  | 4.87E-01  |
| AT5G42410 |           | 0         | -  | -    | -  | -    | 0      | 1         |
| AT1G17345 |           | 2         | -  | -    | -  | -    | -1.15  | 2.31E-02  |
| AT1G74840 |           | 0         | -  | -    | -  | -    | 1.11   | 8.83E-35  |
| AT3G03840 |           | 0         | -  | -    | -  | -    | 0      | 1         |
| AT1G76190 |           | 0         | -  | -    | -  | -    | 0      | 1         |
| AT1G15430 |           | 1         | -  | +    | -  | -    | -0.19  | 2.29E-01  |
| AT4G33940 |           | 1         | -  | -    | -  | -    | 0.53   | 2.59E-07  |
| AT2G21200 |           | 1         | -  | -    | -  | -    | 0.73   | 7.99E-01  |
| AT3G25880 |           | 1         | -  | -    | -  | -    | -1.92  | 8.85E-02  |
| AT1G49010 |           | 1         | -  | +    | -  | -    | -1.59  | 4.17E-06  |
| AT1G48660 |           | 0         | -  | -    | -  | -    | 0      | 1         |
| AT4G18950 |           | 1         | -  | +    | -  | -    | 0.61   | 3.38E-06  |
| AT4G34780 |           | 0         | -  | +    | -  | -    | 0      | 1         |
| AT5G13350 |           | 0         | -  | -    | -  | -    | 0      | 1         |
| AT2G36210 |           | 0         | +  | -    | -  | -    | 0.93   | 3.14E-01  |
| AT2G18010 |           | 1         | -  | -    | -  | +    | 0      | 1         |
| AT1G75590 |           | 0         | -  | -    | -  | -    | 0.40   | 8.58E-01  |
| AT5G50120 |           | 0         | -  | -    | -  | -    | 0      | 1         |
| AT2G24400 |           | 0         | -  | -    | -  | -    | -0.60  | 2.35E-01  |
| AT3G61900 |           | 0         | -  | -    | -  | -    | -0.70  | 1.41E-01  |
| AT1G43040 |           | 0         | -  | -    | -  | -    | 0      | 1         |
| AT2G21220 |           | 1         | -  | -    | -  | -    | -0.32  | 9.19E-01  |
| AT4G34790 |           | 1         | -  | -    | -  | -    | -5.25  | 3.70E-04  |
| AT3G03850 |           | 0         | -  | -    | -  | -    | 0      | 1         |
| AT4G12410 |           | 0         | -  | -    | -  | -    | -0.77  | 4.08E-01  |
| AT4G00880 |           | 1         | -  | -    | -  | +    | -0.91  | 2.56E-01  |
| AT4G13790 |           | 0         | -  | -    | -  | -    | 0      | 1         |
| AT4G09530 |           | 0         | -  | -    | -  | +    | 0      | 1         |
| AT5G38895 |           | 0         | -  | -    | -  | -    | 0.09   | 5.32E-01  |
| AT3G60690 |           | 3         | -  | -    | -  | -    | -2.32  | 2.18E-09  |
| AT4G31320 |           | 0         | -  | -    | -  | -    | 0      | 1         |
| AT3G09980 |           | 1         | -  | -    | -  | -    | 0.85   | 9.78E-16  |
| AT5G10990 |           | 0         | +  | -    | -  | -    | -0.18  | 9.60E-01  |
| AT5G53590 |           | 1         | -  | -    | -  | -    | 1.10   | 1.17E-02  |
| AT4G36110 |           | 0         | -  | -    | -  | +    | -0.04  | 9.56E-01  |
| AT5G66260 |           | 0         | -  | -    | -  | -    | 0      | 1         |
| AT4G22620 |           | 2         | -  | -    | -  | -    | 2.38   | 1.16E-01  |
| AT5G50760 |           | 0         | +  | -    | -  | -    | 0.99   | 1.60E-02  |
| AT3G09870 |           | 0         | -  | -    | -  | -    | 0      | 1         |
| AT3G16350 |           | 0         | +  | -    | -  | -    | -0.62  | 8.84E-02  |
| AT1G63840 |           | 2         | -  | +    | -  | -    | -0.84  | 1.91E-14  |
| AT4G35030 |           | 0         | -  | -    | +  | -    | 1.46   | 2.20E-02  |
| AT3G03847 |           | 1         | -  | -    | -  | -    | 0      | 1         |
| AT1G20470 |           | 0         | -  | -    | -  | -    | 0.28   | 8.72E-01  |
| AT3G03820 |           | 0         | -  | -    | -  | -    | 0      | 1         |
| AT4G38860 |           | 2         | -  | -    | -  | -    | 1.83   | 1.27E-01  |
| AT1G78100 |           | 4         | +  | -    | -  | -    | 1.72   | 2.64E-13  |
| AT4G15430 |           | 1         | -  | +    | -  | -    | -0.86  | 7.50E-02  |

| AGI       | Gene Name | WUS peaks | Ac | deAc | Me | deMe | Log2FC | p adj.    |
|-----------|-----------|-----------|----|------|----|------|--------|-----------|
| AT5G20810 |           | 0         | -  | -    | -  | +    | 2.68   | 1.42E-01  |
| AT2G28085 |           | 0         | -  | -    | +  | -    | 0      | 1         |
| AT2G28780 |           | 0         | -  | -    | -  | -    | -1.96  | 1.01E-01  |
| AT3G53250 |           | 0         | +  | -    | -  | -    | -0.87  | 4.57E-01  |
| AT1G29460 |           | 0         | -  | -    | -  | -    | -1.63  | 2.59E-01  |
| AT2G25790 |           | 1         | -  | -    | -  | +    | -0.37  | 4.07E-03  |
| AT3G12955 |           | 0         | -  | -    | -  | +    | 3.97   | 1.40E-02  |
| AT4G25030 |           | 1         | -  | -    | -  | -    | -2.67  | 4.89E-254 |
| AT1G78990 |           | 0         | -  | -    | -  | -    | 3.66   | 1.99E-01  |
| AT4G37295 |           | 1         | -  | -    | -  | -    | 2.44   | 6.80E-09  |
| AT1G29420 |           | 1         | -  | -    | -  | -    | 0      | 1         |
| AT5G27780 |           | 0         | -  | -    | -  | -    | 0      | 1         |
| AT5G13370 |           | 1         | -  | -    | -  | -    | 0.70   | 9.58E-13  |
| AT5G03310 |           | 1         | -  | -    | -  | -    | 0      | 1         |
| AT1G72430 |           | 2         | +  | -    | -  | -    | 0.63   | 1.40E-03  |
| AT4G26400 |           | 0         | +  | -    | -  | -    | 0.04   | 7.06E-01  |
| AT1G23160 |           | 0         | -  | -    | -  | +    | -4.47  | 3.10E-05  |
| AT5G13360 |           | 1         | -  | -    | -  | -    | -1.23  | 3.64E-08  |
| AT5G63190 |           | 0         | +  | -    | -  | -    | 0.48   | 3.00E-08  |
| AT2G16580 |           | 0         | -  | -    | -  | -    | -1.66  | 4.98E-01  |
| AT4G34750 |           | 2         | -  | +    | -  | -    | -1.25  | 2.55E-03  |
| AT1G75580 |           | 2         | -  | -    | -  | -    | -1.85  | 6.28E-04  |
| AT1G48690 |           | 0         | -  | -    | -  | +    | 0      | 1         |
| AT4G34800 |           | 1         | -  | +    | -  | -    | -6.31  | 4.05E-05  |

**Supplementary Table 3: Response of genes with annotated activities in “auxin response” to WUS.**

Adjusted p-value for RNA-seq data (WUS-GR, DEX vs. mock) was calculated using the Benjamini-Hochberg method in DESeq2. ChIP-seq results for WUS binding, acetylation and methylation are given. Peaks column denotes number of WUS binding events at the locus; Ac denotes increase of acetylation at the locus, deAc denotes reduction in acetylation at the locus; Me denotes increase of methylation at the locus, deMe denotes reduction in methylation at the locus. Processed raw data including read counts can be found in Supplementary File 1.

**Supplementary Data 1: Processed raw data of genomic datasets.**

**Supplementary Data 2: Interactive HTML file allowing intersections of genomic datasets.**
